# Supplementary material
Source: PubMed Central journal article supplement (PMC8900278)

**Supplemental Figure 1.** Kinetics of NABs in MM patients at one month after the second dose of the BNT162b2, at the time of the third dose and at one month after the booster dose. Each individual is represented by a line that connects the three dots across time; thus, the dynamics of NAb titers are depicted in the individual level.

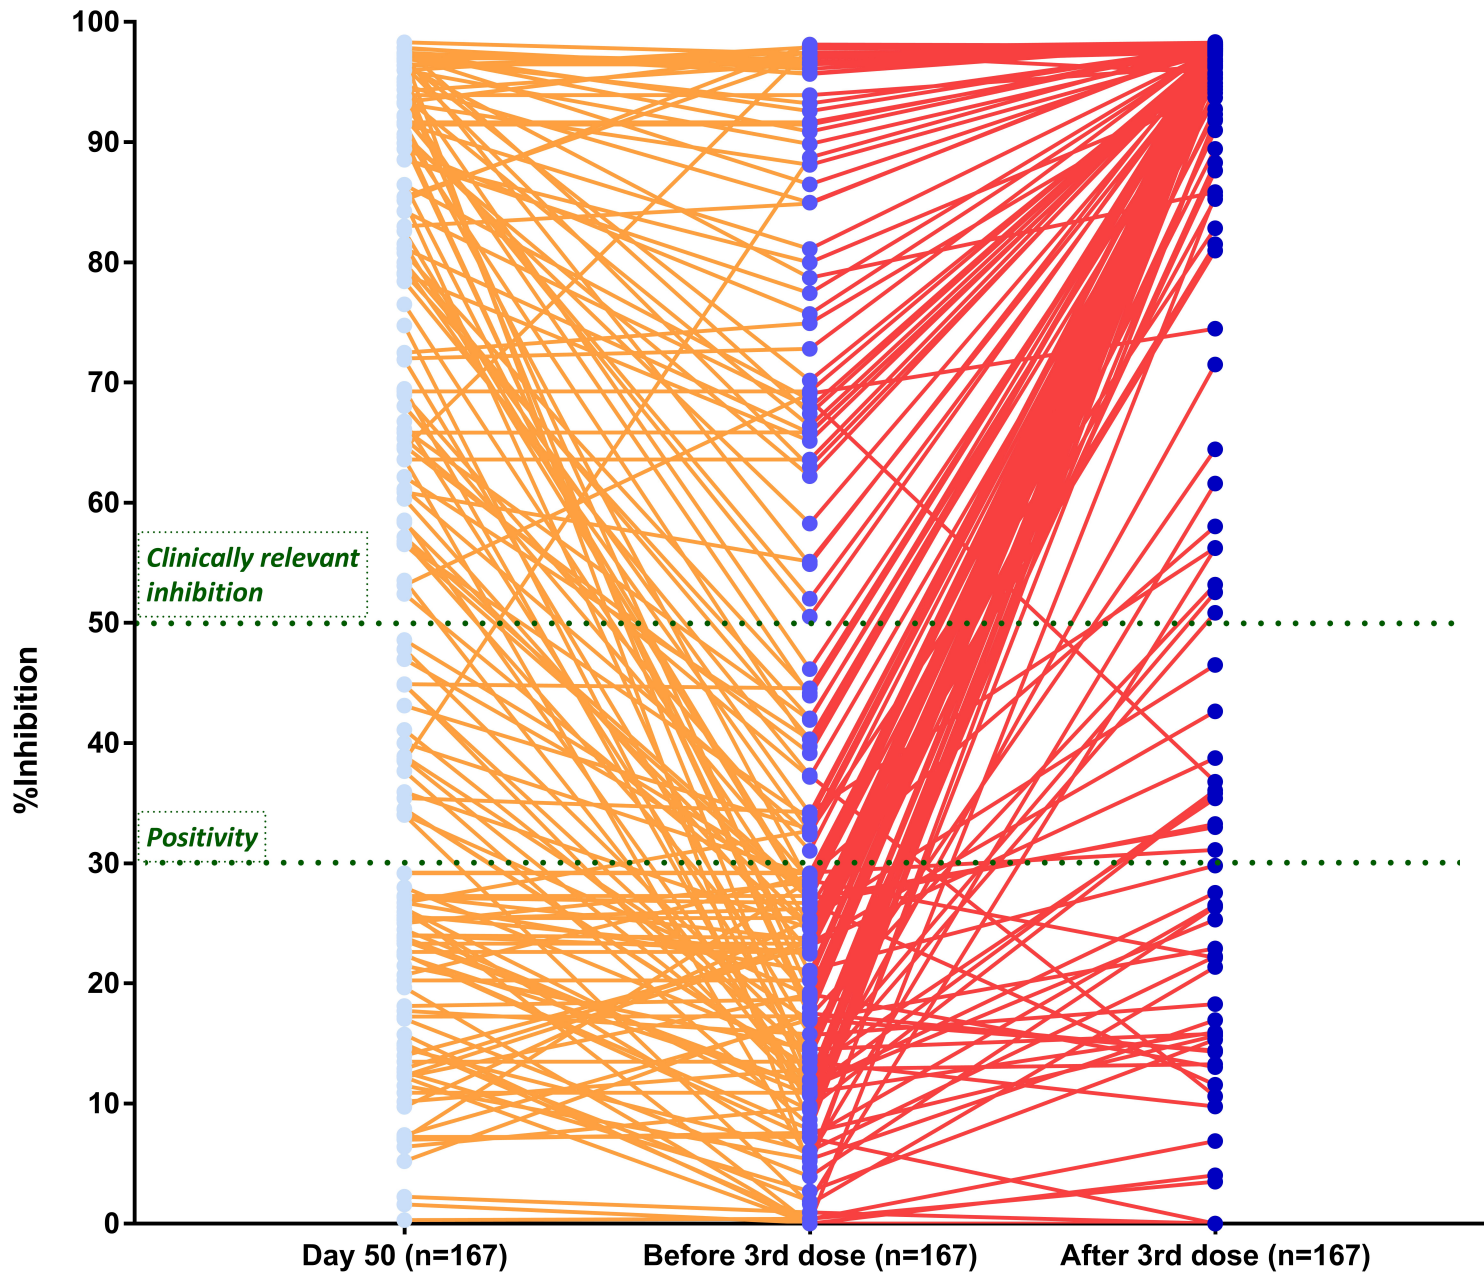

Supplement: bloodBLD2021014989-suppl1.pdf [file bloodBLD2021014989-suppl1.pdf]
